# Supplementary material
Source: publisher site journal article supplement (https://www.dovepress.com/article/389001)
Supplement: Supplementary file 1 [file get_supplementary_file.php]

Supplemental file, Appendix 1: Search Strategy

1. TI AATD OR AB AATD OR AATD OR TI "Alpha 1-Antitrypsin Deficiency" OR AB "Alpha 1-Antitrypsin Deficiency" OR "Alpha 1-Antitrypsin Deficiency" OR TI Alpha 1-Antitrypsin Deficiency OR AB Alpha 1-Antitrypsin Deficiency OR Alpha 1-Antitrypsin Deficiency OR TI Alpha 1 Antitrypsin Deficiency OR AB Alpha 1 Antitrypsin Deficiency OR Alpha 1 Antitrypsin Deficiency
2. TI Alpha-1 Antitrypsin Deficiency OR AB Alpha-1 Antitrypsin Deficiency OR Alpha-1 Antitrypsin Deficiency OR TI α1 antitrypsin deficiency OR AB α1 antitrypsin deficiency OR α1 antitrypsin deficiency OR TI α-1 antitrypsin deficiency OR AB α-1 antitrypsin deficiency OR α-1 antitrypsin deficiency
3. 1 OR 2
4. TI exercise OR AB exercise OR exercise OR TI "physical activity" OR AB "physical activity" OR "physical activity" OR TI exercising OR AB exercising OR exercising OR TI exercises OR AB exercises OR exercises
5. TI "Rehabilitation, pulmonary" OR AB "Rehabilitation, pulmonary" OR "Rehabilitation, pulmonary" OR TI "Pulmonary Rehabilitation" OR AB "Pulmonary Rehabilitation" OR "Pulmonary Rehabilitation" OR TI Rehabilitation OR AB Rehabilitation OR Rehabilitation
6. 4 OR 5
7. TI "Sedentary Behavi*" OR AB "Sedentary Behavi*" OR MH "Sedentary Behavi*" OR TI "sedentary lifestyle" OR AB "sedentary lifestyle" OR MH "sedentary lifestyle" OR TI sedentary OR AB sedentary OR MH sedentary
8. 4 OR 5 OR 7
9. 3 AND 6
10. 3 AND 8
